# Supplementary material for: Role of non-statistical effects in deciding the fate of HO3˙ in the atmosphere
Source: Royal Society of Chemistry journal article supplement (doi:10.1039/d4cp02958e), 2024-01-01
Supplement: d4cp02958e1.pdf [file d4cp02958e1.pdf]

**ESI of**  
**Role of Non-Statistical Effect in Deciding the**  
**Fate of HO<sub>3</sub><sup>•</sup> in the Atmosphere**

Philips Kumar Rai and Pradeep Kumar\*

*Department of Chemistry, Malaviya National Institute of Technology Jaipur, Jaipur,  
302017, India*

E-mail: [pradeep.chy@mnit.ac.in](mailto:pradeep.chy@mnit.ac.in)

Table S1: Cartesian coordinates and all normal mode frequencies of the optimized geometries calculated at LC- $\omega$ HPBE/cc-pVDZ level of theory.

| Species                                    | Cartesian coordinate (Å) |           |           | Frequencies (cm <sup>-1</sup> ) |        |        |        |
|--------------------------------------------|--------------------------|-----------|-----------|---------------------------------|--------|--------|--------|
| <i>cis</i> -HO <sub>3</sub> <sup>•</sup>   | O                        | 0.152582  | -0.538694 | -0.000001                       |        |        |        |
|                                            | O                        | 1.079890  | 0.294943  | 0.000000                        | 296.9  | 568.7  | 853.1  |
|                                            | O                        | -1.128462 | 0.112995  | 0.000001                        | 1317.3 | 1481.3 | 3694.2 |
|                                            | H                        | -0.832086 | 1.046048  | -0.000004                       |        |        |        |
| <i>trans</i> -HO <sub>3</sub> <sup>•</sup> | O                        | -0.160126 | 0.499124  | 0.000085                        |        |        |        |
|                                            | O                        | -1.130875 | -0.263503 | -0.000074                       | 158.2  | 559.8  | 799.1  |
|                                            | O                        | 1.075844  | -0.290507 | 0.000078                        | 1305.5 | 1453.3 | 3775.4 |
|                                            | H                        | 1.721250  | 0.439091  | -0.000716                       |        |        |        |
| TS <sub><i>cis-trans</i></sub>             | O                        | -0.166861 | 0.510454  | -0.00593                        |        |        |        |
|                                            | O                        | -1.114004 | -0.294954 | 0.017251                        | -148.4 | 584.1  | 809.8  |
|                                            | O                        | 1.104854  | -0.197994 | -0.112681                       | 1304.1 | 1358.7 | 3772.4 |
|                                            | H                        | 1.408088  | -0.140048 | 0.810879                        |        |        |        |
| <i>cis</i> -TS <sub><i>Diss</i></sub>      | O                        | 0.320823  | -0.535216 | -0.000003                       |        |        |        |
|                                            | O                        | 1.134003  | 0.344931  | 0.000001                        | -528.5 | 86.2   | 431.3  |
|                                            | O                        | -1.321387 | 0.064246  | 0.000002                        | 1045.8 | 1623.7 | 3740.1 |
|                                            | H                        | -1.067514 | 1.008313  | 0.000005                        |        |        |        |
| <i>trans</i> -TS <sub><i>Diss</i></sub>    | O                        | 0.300913  | 0.509088  | 0.000000                        |        |        |        |
|                                            | O                        | 1.167767  | -0.311347 | 0.000000                        | -525.9 | 123.3  | 439.6  |
|                                            | O                        | -1.247618 | -0.267464 | 0.000000                        | 1017.9 | 1643.0 | 3765.6 |
|                                            | H                        | -1.768494 | 0.557776  | -0.000001                       |        |        |        |
| OH <sup>•</sup>                            | O                        | 0.000000  | 0.000000  | 0.108864                        | 3725.2 |        |        |
|                                            | H                        | 0.000000  | 0.000000  | -0.870911                       |        |        |        |
| O <sub>2</sub>                             | O                        | 0.000000  | 0.000000  | 0.595835                        | 1781.0 |        |        |
|                                            | O                        | 0.000000  | 0.000000  | -0.595835                       |        |        |        |

Table S2: The relative energies of HO<sub>3</sub><sup>•</sup> with respect to OH<sup>•</sup> and O<sub>2</sub>, calculated using various DFT functionals with the cc-pVDZ basis set, alongside higher-level theories, are provided. All DFT and CCSD(T) calculations exclude ZPE, while the post-CCSD(T) method includes ZPE.

| Level of Theory                  | <i>cis</i> -HO <sub>3</sub> <sup>•</sup> | <i>trans</i> -HO <sub>3</sub> <sup>•</sup> | TS <sub><i>cis-trans</i></sub> |
|----------------------------------|------------------------------------------|--------------------------------------------|--------------------------------|
| Post-CCSD(T) <sup>1</sup>        | -2.96                                    | -3.11                                      | -2.12                          |
| LC- $\omega$ HPBE                | -2.82                                    | -1.36                                      | -0.75                          |
| $\omega$ B97XD                   | -3.52                                    | -2.53                                      | -1.64                          |
| M08HX                            | -3.89                                    | -2.08                                      | -1.55                          |
| CAM-B3LYP                        | -5.12                                    | -3.73                                      | -2.98                          |
| M06                              | -5.53                                    | -4.59                                      | -3.52                          |
| B3LYP                            | -6.04                                    | -5.30                                      | -4.03                          |
| M11                              | -6.30                                    | -4.57                                      | -4.03                          |
| MN15L                            | -7.61                                    | -6.89                                      | -5.36                          |
| LC-BLYP                          | -8.36                                    | -6.22                                      | -5.83                          |
| TPPSh                            | -8.38                                    | -7.99                                      | -6.43                          |
| tHCTHhyb                         | -8.85                                    | -8.37                                      | -6.81                          |
| BHandHLYP                        | 8.99                                     | 10.08                                      | 13.01                          |
| BLYP                             | -18.25                                   | -18.08                                     | -15.41                         |
| PW91                             | -21.78                                   | -21.57                                     | -18.76                         |
| CCSD(T)/aug-cc-pVDZ <sup>1</sup> | 1.63                                     | 2.06                                       | 2.37                           |
| CCSD(T)/aug-cc-pVTZ <sup>1</sup> | -2.09                                    | -1.18                                      | -0.86                          |
| CCSD(T)/aug-cc-pVQZ <sup>1</sup> | -2.73                                    | -1.77                                      | -1.36                          |
| CCSD(T)/CBS <sup>1</sup>         | -3.24                                    | -2.22                                      | -1.78                          |

1. Rai, P. K.; Kumar, P. *Int. J. Chem. Kinet.* **2023**, *55*, 619–628.

Figure S1: Comparison of energetics and geometrical parameters obtained at LC-wHPBE/cc-pVDZ level of theory with the post-CCSD(T) corrected potential energy surface. The geometrical parameters, i.e., bond lengths (Å) and angles (degree) in parenthesis are depicted for CCSD(T)/aug-cc-pVDZ optimized level of theory. Similarly, the energetics at post-CCSD(T) method are shown in parenthesis.

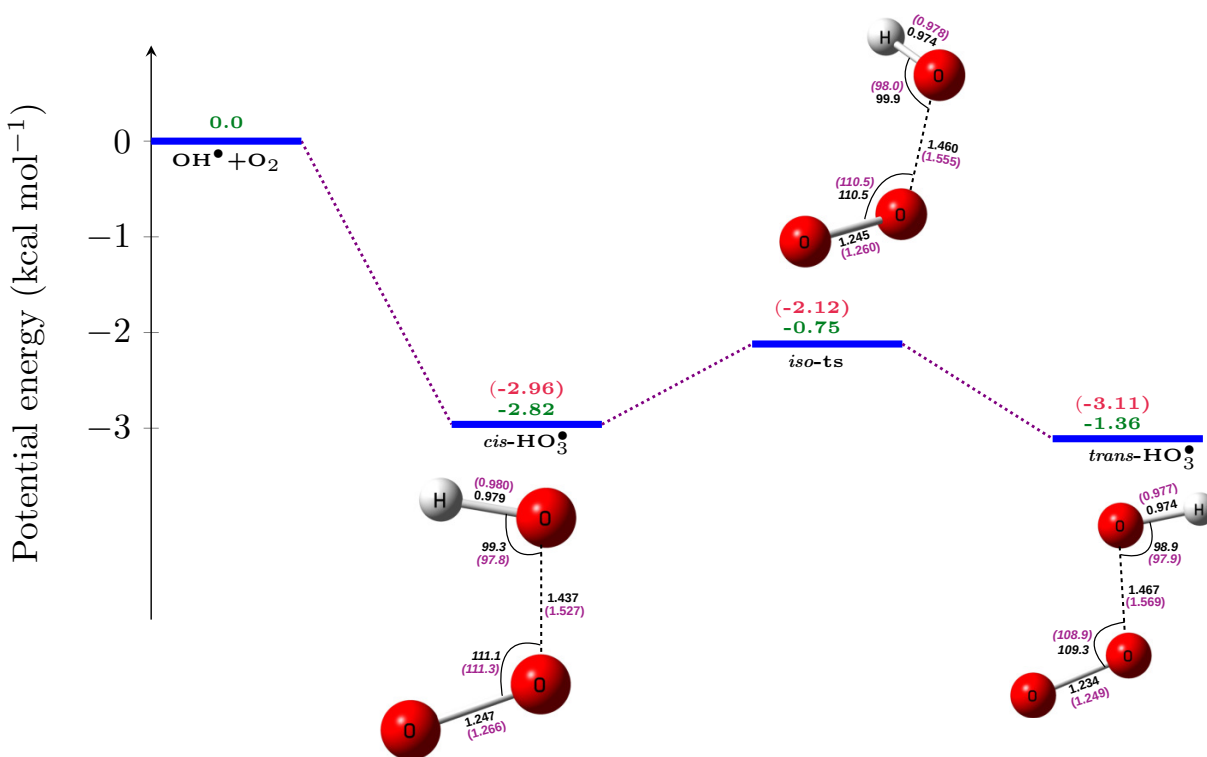

Figure S2:  $\text{Ln}[N(t)/N(0)]$  vs. time (in picosecond) excited using microcanonical sampling at total energies of  $E = 15, 20, 30,$  and  $40 \text{ kcal mol}^{-1}$ .

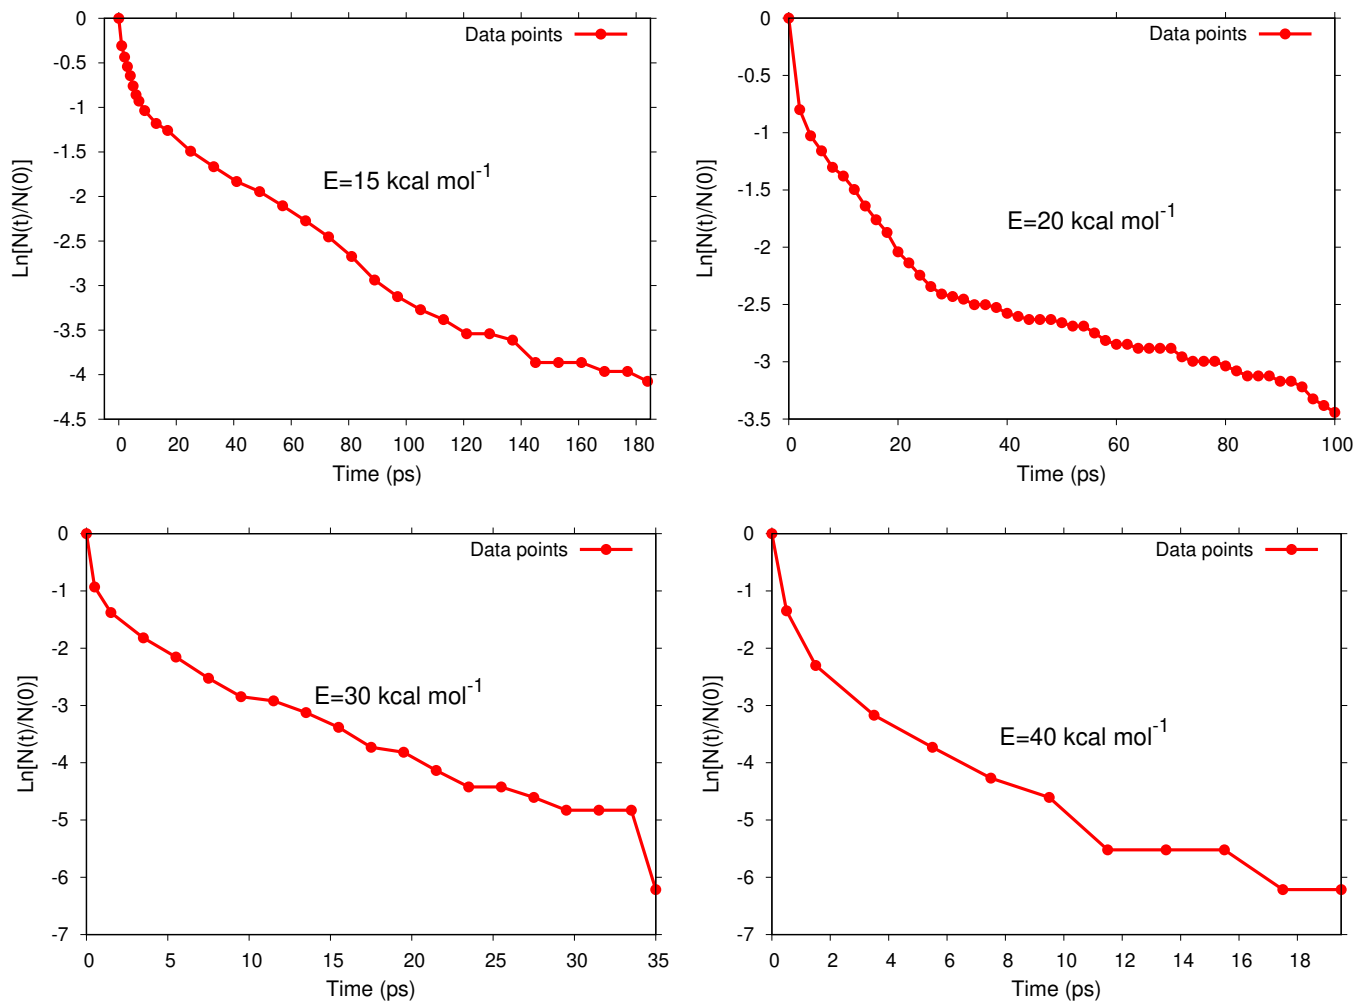

## Details of kinetics calculations

If  $N(t)$  is exponential, unimolecular rate constant equals the RRKM rate constant, whereas if  $N(t)$  is non-exponential, unimolecular rate constant varies with pressure. Therefore, we have calculated the rate constant in three regions; i.e., high pressure limiting rate constant ( $k^\infty$ ), low pressure limiting rate constant ( $k^0$ ) and finite pressure unimolecular rate constant ( $k$ ) using following expressions:

$$k = \omega \frac{\sum_i f_i k_i / (\omega + k_i)}{1 - \sum_i f_i k_i / (\omega + k_i)}$$

Here,  $\omega$  is the collision frequency, which is proportional to the pressure.

$$k^\infty = \sum_i f_i k_i$$

$$k^0 = \frac{1}{\sum_i f_i / k_i}$$

( $f_i$  and  $k_i$  are the fitting parameters for  $N(t)/N(0)$  distributions. These values are listed in table 1 of the main manuscript.)

Table S3: Rate constants ( $\text{ps}^{-1}$ ) at different pressures and corresponding half-life in ps ( $0.693/\text{rate constant}$ ) for the different microcanonical excitation energies ( $\text{kcal mol}^{-1}$ ).

|                     | E = 15 | E = 20 | E = 30 | E = 40 |
|---------------------|--------|--------|--------|--------|
| $k^0$               | 0.05   | 0.07   | 0.47   | 1.48   |
| $k$                 | 0.06   | 0.10   | 0.52   | 1.56   |
| $k^\infty$          | 1.29   | 1.18   | 2.39   | 3.23   |
| $\tau_{1/2}^0$      | 13.86  | 9.90   | 1.49   | 0.47   |
| $\tau_{1/2}$        | 11.55  | 6.93   | 1.34   | 0.44   |
| $\tau_{1/2}^\infty$ | 0.54   | 0.59   | 0.29   | 0.21   |
